# Supplementary material for: A 3,000-year-old, basal S. enterica lineage from Bronze Age Xinjiang suggests spread along the Proto-Silk Road
Source: PLoS Pathog. 2021 Sep 21;17(9):e1009886. doi: 10.1371/journal.ppat.1009886 (PMC8486138; doi:10.1371/journal.ppat.1009886)
Supplement: S3 Table — Pseudogenes shared between both ancient genomes are marked in yellow. (XLSX) [file ppat.1009886.s011.xlsx]

## Sheet: S3 Table
S3 Table. Pseudogenes identified in XBQM20S and XBQM90S. Pseudogenes shared between both ancient genomes are marked in yellow.
Ancient genome	Gene identifier	Name	Function	Mutation*	Gene length (in bp)	Gene Reference Sequence
XBQM20	STMMW_01271	ftsL	cell division protein FtsL	G292T	366	ATGATCAGCAGAGTGACAGAAGCCCTAAGCAAAGTGAAGGGATCGATAGGAAGCAACGAGCGCCATGCCTTGCCTGGCGTGATCGGTGACGATCTTTTGCGGTTCGGGAAGCTGCCACTCTGCTTGTTCATTTGCATCATTTTAACGGCGGTGACGGTGGTCACGACGGCGCACCATACTCGTTTACTCACCGCGCAGCGTGAACAATTGGTTCTGGAGCGCGATGCATTGGACATTGAATGGCGCAACCTGATCCTTGAAGAAAATGCGCTCGGCGATCACAGCCGGGTGGAGCGGATCGCAACGGAAAAGCTGCAAATGCAGCATGTTGATCCGTCCCAAGAAAATATTGTAGTGCAAAAATAA
XBQM20	STMMW_01171	leuC	3-isopropylmalate dehydratase large subunit	G869A	1401	ATGGCCAAAACGTTATACGAAAAATTATTTGATGCCCACGTGGTCTTTGAGGCGCCAAACGAAACGCCGCTGCTGTACATCGACCGCCACCTGGTGCATGAAGTCACCTCTCCGCAGGCGTTTGACGGTCTGCGCGCGCACCATCGTCCGGTACGTCAGCCAGGGAAAACCTTCGCTACGATGGATCACAACGTCTCGACGCAGACTAAAGACATTAATGCTTCCGGTGAAATGGCGCGTATCCAGATGCAGGAGCTGATTAAGAACTGTAACGAGTTCGGCGTCGAGCTGTATGACCTGAATCACCCATATCAGGGCATCGTCCATGTGATGGGGCCGGAACAGGGCGTCACCCTGCCGGGCATGACCATCGTCTGCGGCGACTCCCACACCGCCACC…
XBQM20	STMMW_01131	thiP	thiamine/thiamine pyrophosphate ABC transporter permease ThiP	C1513T	1611	ATGGCAACGCGCCGTCAGCCGTTAATTCCCGGCTGGCTGATTCCGGGGCTGTGCGCCGCCGCGCTGATGATAACCGTCTCGCTGGCGGCCTTTCTGGCGCTTTGGCTGAATGCGCCGTCGGGCGCGTGGTCGACAATCTGGCGGGATAGCTACCTGTGGCATGTGGTGCGCTTCTCATTCTGGCAGGCGTTTCTGTCCGCAGTGCTGTCTGTGGTCCCGGCGGTTTTTCTCGCCCGCGCGCTTTATCGACGCCGTTTTCCTGGACGTCTGGCGCTGCTGCGTCTGTGCGCCATGACGCTGATTCTGCCGGTACTGGTTGCCGTGTTCGGCATTCTTAGCGTGTATGGCCGTCAGGGCTGGCTGGCCTCGCTGTGGCAGATGCTGGGGCTTCAGTGGACA…
XBQM20	STMMW_01911	yadB	putative glutamyl t-RNA synthetase	G317A	942	ATGACAGGCGGGAGTTTTCCCGCCTTATTCTTTATTGCCCGCAGCATGACTGACTCACACTATATTGGCCGTTTCGCGCCGTCGCCATCCGGCGAACTGCATTTCGGCTCGTTAATCGCCGCCCTCGGCAGCTATCTACAAGCCCGTGCGCAACGCGGAATTTGGCGCGTTCGCATCGAGGATATCGACCCCCCACGTGAAGTTCCCGGTGCCGCAGCGACCATTCTGCGCCAGCTGGAACATTACGGCCTGCACTGGGATGGCGAGGTCTTATGGCAATCACAGCGTCATGAGGCTTATCGCGAGGCGCTGGCCTGGCTTCACGAGCAGGGACTGAGCTACTACTGCACTTGCCCCCGCTCGCGCATTCAACGTCTGGGCGGTATTTACGACGGCCAT…
XBQM20	STMMW_01531	ampE	transcriptional regulator	G663A	855	ATGACGCTGTTTACGACATTACTGGTGCTGATTGTCGAGCGCCTGTTTAAGCTGGGCGAGCACTGGCAGCTCGATCATCGGCTGGAGGCGCTATTCCGTCGGATTACGCATTTTTCGATGTTGCGCACGATGGGAATGACGGCGATCGCGATGGTGGTGACTTTTCTACTGCTCCAGGCGTTAAAAGGGCTGCTATTTAACGTGCCGACGCTGGTGGTGTGGATTCTCCTGGGCGTGCTGTGTATCGGCGCGGGCAAAGTGCGAGTACATTATCACGCCTGGCTGAAAGCGGCGTCCCGTAACGATCCGCATCCTTGCGAGGCGATGGCCAGCGAGCTTACGCTGATTCACGGCGTGCCGCCGGATTGTAATGAGCGTGAATTTTTGCGTGAGCTGCAA…
XBQM20	STMMW_07611	kdpD	two-component system sensor histidine kinase KdbD	G710A	2685	ATGAACGACGAACCCTTGCGTCCTGATCCGGATCGCTTGTTGGAACAAACGCCCCCGCCCCACCGGGGGAAGTTGAAAATTTTCTTCGGCGCCTGCGCAGGTGTCGGAAAAACCTGGGCGATGCTGGCGCAAGCGCAGCGGCTGCGAGCGCAGGGGCTGGATGTGGTGATCGGCGTGGTAGAGACGCATGGCCGTAAAGAGACCGCCGCACTACTTGACGGGCTGACCATTCTGCCGCCAAAACGTCACTCGCACCGGGGGCGGCAAATCCGCGAATTTGACCTGGATGCCGCCCTCGCCCGGCGTCCGGCGCTGATTTTAATGGATGAGCTGGCGCACAGTAACGCGCCTGGCTCACGCCATCCTAAGCGCTGGCAGGATATTGAAGAGCTGCTGGAA…
XBQM20	STMMW_12921	mipA	MltA-interacting protein MipA, partial	G434A	747	GTGACCAAACTTAAACTTCTGGCTCTTGGCGTGTTTATTGCAACATCCGCCAGCGTCGCGCACGCTGAAAGCAACCTGACGTTGGGCGCAGGCGTTGGTGTGGTTGAACACCCTTATAAAGATTACGATAGCGATGTTTATCCGATACCGGTCATCGCTTATGAAAGCGAAAACTTCTGGTTCCGTGGTCTGGGCGGCGGGTACTACTTGTGGAATGACAATGCCGATAAGTTGTCAATCATGGCATACTGGTCCCCGATGTACTTCAAACCGGGCGACAGCGATGACCATCAGTTGCGTCGTCTGGACAGGCGTAAAAGTACTATGATGGCGGGCGTTTCTTACGCGCATCACACCCAATATGGATTCCTGCGTACCTCACTGGCAGGGGATACGTTG…
XBQM20	STMMW_14231	ssaQ	type III secretion system protein SsaQ, partial	C670T	969	ATGTTAAGAATAGCGAATGAAGAGCGTCCGTGGGTGGAGATACTTCCAACGCAAGGCGCTACCATTGGTGAGCTGACATTGAGTATGCAACAATATCCAGTACAGCAAGGGACATTATTTACCATAAATTATCATAATGAGCTGGGTAGGGTGTGGATTGCAGAACAATGCTGGCAGCGCTGGTGTGAAGGGCTAATTGGCACCGCTAATCGATCGGCTATCGATCCTGAATTGCTATATGGAATAGCTGAATGGGGGCTGGCGCCGTTATTGCAAGCCAGTGATGCAACCCTCTGTCAGAACGAGCCGCCAACATCCTGCAGTAATCTACCACATCAGCTAGCGTTGCATATTAAATGGACAGTTGAAGAGCATGAGTTCCATAGCATTATTTTTACA…
XBQM20	STMMW_14691	fumA	fumarate hydratase class I, anaerobic	G103T	1647	ATGTCAAACAAACCCTTCTTTTATCAAGACCCTTTTCCCCTCAAAAAGGACGATACCGAGTACTACTTGTTGACCAGCGAACATGTTTCCGTCGCCGAATTCGAAGGACAAGAGATCCTGAAAGTCGCGCCGGAAGCGCTAACGCTGTTGGCGCGTCAGGCCTTCCACGATGCGTCTTTTATGCTACGTCCCGCGCATCAGCAGCAGGTGGCGGATATTCTGCGCGATCCGCAGGCCAGTGAAAACGACAAATATGTCGCGCTGCAATTCCTGCGAAACTCCGATATCGCGGCCAAGGGCGTGTTGCCCACCTGCCAGGATACCGGTACGGCCATTATTGTCGGCAAAAAAGGTCAACGCGTCTGGACTGGTGGAGGTGATGAAGCGGCGCTGGCTCGC…
XBQM20	STMMW_15831	yncC	colanic acid/biofilm transcriptional regulator	C469T	666	ATGCCGGGTACGGAAAAAACACAACATATAAGCCTGACCACACAGGTTGAAAATCGGTTAAAGCATCAATTGTCTATTGGCGCATTAAAACCAGGCGCAAGGCTTATCACTAAAAATATCGCTCAAGAGTTAGGCGTCAGTATTACGCCGGTGCGTGAGGCCCTGTTAAGGCTGGTCTCTTCCAGTGCTTTGGCGGTGGCGCCAGCACAGGCGTTTATGGTGCCGGAGATCTCGCTGGAAAGTTTGCTGGAAATTAATACGATTCGTACTGCCCTGGAGGAGATGGCGGTGGTCGCCGCTGCGGGTAAGATTACCCCGGATCGCGAGCAGACGCTGAATGCGCTATTAGATGAATTTCAACAGGCGCTGGAAAGTGGCGTTATGGAGAAAATTCTTTTG…
XBQM20	STMMW_25111		Exported zinc metalloprotease YfgC precursor	C1162T	1464	ATGTTCAGGCAGTTGAAAAAAAACCTGGTGGCAACCCTCATTGCAGCATTGGCTCTCGGTCAGGTCGCGCCCGCATTTGCCGACCCTGCCGACACGCTGCCCGATATGGGAACCTCGGCAGGAAGCACGCTTTCTATCGGACAAGAGATGCAAATGGGCGACTTTTATGTGCGCCAGCTACGCGGCAGCGCGCCGTTAATCAACGATCCGCTGCTGGTGCAATACATTAACGCGCTGGGTATGCGTCTGGTCTCGCACGCCGACTCCGTCAAAACGCCCTTCCATTTTTTCTTGATCAATAATGACGAAATCAACGCCTTCGCGTTCTTTGGCGGCAATGTGGTGCTGCACTCGGCGCTTTTTCGCTACGCGGATAACGAAAGCCAGCTAGCTTCAGTC…
XBQM20	STMMW_27051	lapB	Putative type I secretion protein, ATP-binding protein	C116A	2181	ATGACCCGCGCCGCCCCCGATGTAGAAGAGGTACTCAGTGAGCGCGCGCTAAGCCAATGGGCGCAGGCCATCAGCTATGTCGCCGGTCATTATCGCGTTGCCTGTTCTCCCGGTTCAATTCAGGCCAACGCCCCGTGGCTTAGGGGTAAAAGCAGAACGACCGCCTTAACGCAGCTCGCGCGGCAGGCGGGTTTATCCTTTCATGCGCCGGACATAGACAAAACGGCATTTAGTCAGTGGCGATTGCCGTTGGTTGTCGAGCTCCGGGACGGGCAGTTATTGGTCATCGAACATGTTAATGGCGAAGAGGCGGTAGACGTTTTTGTGATTGAAGAAGAGGGTCAGCGTAACCGCCTGACGCTCAGCGAGTTATTGCCGGAGATCCTCTATGTTGCCGCG…
XBQM20	STMMW_32461		hypothetical protein	T149A	387	GTGAAACTGACCGATAAGCCGGGTTCTGTCGTGGACAGTCATTCATCTAGGCCAGCAATCGCTCACTGGCTCAAGCAGCCTACCCGGGTTCAGTACGGGCCGTACCTTATGAACCCCTATTTGGCCTTGCTCCGGGTGGAGTTTACCGTGCCACGGACTGTTACCAGCCGCGCGGTGCGCTCTTACCGCACCCTTTCACCCTTACCTGATCCCACTTACGTGGGCCATCGGCGGTTTGCTCTCTGTTGCACTGGTCGTGGGTTTCCCCCCCAGGCGTTACCTGGCACCCTGCCCTATGGAGCCCGGACTTTCCTCCCCTCCGCCCGTCTCCCCGAAAGGACGACGACGAAGCGGCGACTGTCTGGTCAGCTTCGGCGCGCAGTATAG
XBQM20	STMMW_35961	yhjC	LysR family transcriptional regulator	G683A	900	ATGGATAAAATATATGCAATGAAATTGTTTGTACGCGTGGCGGAACGGGAAAGTTTTTCCCGTGCAGCAGAGGATATCGGCCTTCCCAAAGGCAGCGTCTCACGGCAAATACAAGCGTTAGAACATCAACTGGGCATCCGCCTGCTCCACCGCACCACCCGGCGGGTACAGCTTACTCAGGACGGAATGGTTTACTACGAACGGGCAAAAGATCTGTTGAGTAACCTGGATGAACTGGAGGGTCTTTTCCAGCCTGATCCCGCCAGTATCAGTGGCAAAATACGGGTAGATATACCGCCATGTCTCGCAAACAGCCTCATCATGCCGCGCCTGCCCACTTTTTTGCATCAGTATCCCGGCATTGCGCTGGAACTTTGTAGTAGCGATCGACAGGTCGAT…
XBQM20	STMMW_36931	yibP	murein hydrolase activator EnvC	G754T	1284	ATGAGGGGAAAGGCGATTAACACCATTCAACAGGCCGTGAAACCAAGAACGTTTTCAGTCAGGCCTTTGTTCTACGCCAGCGTACTTAGCGCTGGCGTATTGTTGTGCGCCTTTTCCGCCCACGCGGATGACCGTGATCAACTCAAATCTATTCAGGCCGATATCGCCGCGAAAGAACGCGACGTACGCCAGCAGCAGCAACAACGCGCCAGCCTCCTGGCACAACTTAAAGCCCAGGAAGAGGCCATCTCAGCCGCAGCACGTAAGCTGCGCGAAACGCAAAGCACCCTGGATCAGTTAAACGCGCAAATTGATGAGATGAACGCCTCAATTGCCAAACTGGAGCAGCAAAAAGCCAGCCAGGAGCGTAATCTTGCCGCGCAGTTGGACGCCGCTTTC…
XBQM20	STMMW_42751	aspA	aspartate ammonia-lyase	C544T	1437	ATGTCAAACAACATTCGTATCGAAGAAGATCTGTTGGGTACCAGGGAAGTTCCAGCTGAAGCCTACTATGGTGTTCACACTCTGAGAGCGATTGAAAACTTCTACATTAGCAATAACAAAATCAGCGACATCCCTGAATTTGTGCGTGGCATGGTTATGGTAAAAAAAGCGGCGGCGCTGGCCAACAAAGAGCTGCAAACCATTCCTAAGAGTGTGGCGAACGCCATCATTGCCGCATGTGATGAAGTCCTTAACAACGGTAAGTGCATGGACCAGTTCCCGGTAGATGTCTATCAGGGCGGCGCGGGCACTTCCGTCAACATGAATACCAACGAAGTGCTGGCCAACATCGGGCTGGAACTGATGGGTCATCAGAAAGGTGAATATCAGTACCTGAAC…
XBQM20	STMMW_42181	gst	glutathione S-transferase	G485A	669	ATGCTGACGGTGCACCATTTAAATCAGTCTCGTTCGCAGCGCATCTTGTGGGCGCTGGAAGAGCTGGCGTTGCCTTACCAGATTGTGCGTTACCAGCGTGAAAAGACCATGCTGGCGCCGCCGGCATTGAAAAAAGTGCATCCGCTGGGCAAGTCTCCGGTTATCGAAGATCACGGTATGGTTATTGCGGAATCGGGCGCCATCCTGGAATATTTGCAGGACACTTACGACAGTATCGGACGCTTTAAACCTGCGGATGCGCAGGGGAAACAACACTATCGCTTCTGGCTACATTACGCTGAAGGTTCTCTCATGCCCTTGCTATTGATGAGACTGCTCTTTACCTCTCTGGGTAAACCGCCGGTACCATTGGGCCTGCGAACGTTGGGCGGCGTTATC…
XBQM20	STMMW_44121	arcA	Arginine deiminase	G317A	1221	ATGGAAAAGCATTTTGTCGGTTCTGAAATCGGTCAATTACGCAGCGTAATGTTGCATCGGCCCAATCTCAGCCTAAAAAGACTTACCCCTTCAAATTGTCAGGAATTACTTTTTGACGATGTATTATCCGTAGAGCGCGCTGGCGAAGAGCATGACATTTTTGCCAACACGCTGCGCCAGCAAGGGATAGAAGTGTTGCTGTTAACCGACCTGCTCACCCAAACGCTGGATGTGGCTGACGCTAAAGCCTGGCTACTGGATACGCAAATTTCCGATTATCGCCTTGGGCCCACCTTTGCCGCAGATATTCGCGCCTGGCTGGCGGATATGCCGCACCGTGAACTGGCTCGCCATTTAAGCGGCGGTTTAACTTACGGCGAAATTCCCGCCTCCATAAAA…
XBQM20	PSLT025		putative cytoplasmic protein	128_D1	297	ATGGATGCTGAATTTCAGAAACAGGGGCTCACCGACCTAACAGAAACAGATCTGCAGGCCGTTGTAACTCCCGGGGAGACACTCCGGTTACTGCCGACACTGGCGCGGTTACTGCATGTTTTGCGAGAAAAACCAGAGGCCTTCTCCCTCTCAGCAGCTTCATACGAAGAAGATACTTCCTCAGCTTTGAAAACACTGCTGGTCCGTACAGGATTCACAATACACCAGATAAGAGAAATGCGACTTCACCTTATTCGCTGGCAATTAATAAGTCAGGAAGAGTATGACCGGGAATAA
XBQM20	STMMW_00221	bcfC	outer membrane usher protein FimD	C1636T	2622	ATGCGTAATCAGCTTTTCATGACGCGATATTACTCCAGCGTAACTAAACCCGTATTAACCCCGCTGGCGTTGGCTATCGCACTGGCGCCTGCGCCGGGGTGGGCGGAAAACTATTTCAACCCGGCATTTCTGTCTGACGACCCGTCTGCGGTGGCCGACCTATCGACCTTTTCCCGTAATGCCCAGGCGGCGGGGATGTATCGCGTTGACGTTTACCTGAACAATACGTTTCTCGCAACCAGAGACATTGCCTTCCAGGCGGTGAAAACGACGGGAAAAAGCGCGCCCACCGATGACAGCGGATTACGCGCCTGCCTGACGCCTGAAATGCTTAAAAATATGGGGGTAAACACCGGGGCGTTTCCACTGTTGGCGAAGGCGGCGGCGGGAAGTTGCCCG…
XBQM20	STMMW_12571		hypothetical protein	C225A	273	TTGTTCCTGGTGGTCTTACCGCCAGTTGCTGAAAAAGACAACGATAATGTAACTGTTGCAGAGACTGACGAATACGACGACCGTGAATTTTATTTTTGGCGACCATATTTCCTCCCAAAAGGCCGCCCGAAGGCGGCGCTGGGTTTGATAATGGAGAAGGGCGTTGGTCACTGCCATAACCAACCTGTATACATTAATGCAATTGATAATCATTATCAATTTGGCTGGTGGAGAAAAATTGTAAAGATGAAGGGACAGCGGAAATGGCAATGA
XBQM20	STMMW_18461		hypothetical protein	A40T	171	GTGACATCCGGCGTGTTACGACTGCGGGTTATCCAATTTAGAGACCATAATGAGAGTCTGACTGCGAGAGTTACCCTGTGCAGTCCGACCGACGCAGCAACGTTTGACACGATTCTCGACAACAGCATCTCCTGGTGCAGGAGAAATGATATTCAAAGCGATATCGACTAA
XBQM20	STMMW_21702		hypothetical protein	G61T	117	TTGAAATGTTGCGCACTTATTGCTTTACCGTTTTTCTTCCTGCTGTACGCAGCGGTAAGCGAAGCATGGTTTAAGGCAAATGGCGACAAGAGAGATGCCGGTATGCGCATTGAGTAG
XBQM20	STMMW_20361		peptidase	C280T	474	ATGGCATTAACCGATACCGCTGGCGGCACGCAGACCGATCCGGGTACAGGAAAACCGTCAGAAAATCCACCCGCCGCTCCCAATAAGCCCACTCCACCGAAAGAAGAAACGCCGCCCGGCGCGCCGGAGAAATACGCGTTCACCGCCCCTGAAGGTCAGGAACTCGATACCAGCGCGCTGGCGCAGTTCGAACCAGTGGCGCGTGAACTGAACCTGACGCAGGAGCAGGCGCAGAAGCTGGTGGACGTCTATCCGAAAGTGCTGGCGGGAGTGCAACAACAGCAAGCGGAGTCATGGCAGAAGCAAACAGAAGACTGGGCTGCGGCAGTTAAAGCCGATAAAGACATTGGCGGTGACAAGCTGGCGTCTAATCTTGGCGCAGCTCAGCGGGCTATCGAC…
XBQM20	ZV79_RS05300		hypothetical protein	C109T	138	ATGACACTCCAGACAAATATCAGCAGAGAGACAAAAGCGGCAAAGACCCAGGAGGTATATAAGCACGTTGTTCTTTTCAAAATGGCCGCCTCCTCTCACATAAAACGACAACTACAGCTTATGTCCCGTGTTACATAA
XBQM20	STMMW_00241	bcfE	fimbrial protein BcfE	C52T	546	ATGAACAGATCACACTGCGCTCTTTTTGCCATGGGACTGATGCTGTGTCCACAAATCAATGCCAGCGCTGACGACCTCGCTTATAACCTCGAATTTACCGGCACTATTGTGGCGCAAACCTGCGACATAGATATTTCCAGTCTCAGTCAAAGTATTGATTTAGGGCAGTTTGCAGTTGGCGATTTCCCCTCGACGGGAACAACGACAAAATTTAAGCCCTTTAATATCAACCTCAAAAATTGTTCCCGAGGAATTACCGGGGCGAAGATCTGGTTTACCGGCGAACCCGATCCGGACAATCCCGCGCTACTGGCGATAACCGACACCGGGATGGGAAGCGGAAACATGTTAGCAAGCGGGGTTGGGGTGGAAATTCTGAATGATGATCAGGATACCATC…
XBQM20	STMMW_02021	stfC	outer membrane usher protein	C1099T	2658	ATGGCTCACTATAAAAAATTTCGTCTGAGCACGCTTGCGGCCGTGGTGGGTATTGTTCTGGCTGTCGGTCCGGAAAATAGCTACGCGGAAGCGCCCATTCAATTTAATACCCGATTTCTTGATGTTAAAGATGATGCCAGCCTGGATCTCTCCCGTTTTTCCCGTAAAGGCTACATTATGCCGGGGAGCTATCATCTCCAGGTGCTGGTCAATCAGAGTCAAATTGTCCAGGATAATGTTATTACGTATTCCGTTGATAATAACGATCCTGATAACACCTATCCCTGTTTATCGCCTGAACTGGTCTCGCTGCTGGGGTTAAAACCTGAAATAGCAGATAAAATGATCTGGATAAATGCCGGTCAGTGTCTGCAACCAGATCAACTGGAAGGGATGGAA…
XBQM20	STMMW_02661	sciC	type VI secretion protein	G1850A	1884	ATGGATCCACGGCTACTGGAGTATTACAACCGCGAACTGAGCTACCTGCGGGAGACCGGTGCTGAGTTCGCCACCCTCCATCCCAAAATTGCCGCCCGACTGGGGATGCAGGGAACCGATATTGCCGACCCGTATGTGGAACGCATGATCGAGGCGTTCAGCTTTCTGAGCGCCCGCACTCAGCTAAAAATTGACGCCGAGTTTCCCCGCTTCACACAGCGGTTACTGGAAGTCGTCAGCCCCAATTACGTCACCCCCACGCCATCGATGGCAGTGGTAAAGCTGTATCCCGATACGCAGGAAGGCGACCTGGCGAAAGGGGTCACCGTGCCGCGCGATACCGCGTTCGTTTCCCCCATCCCGGAAGGCGAAAATACCGCCTGCCAGTTTCGCAGCAGC…
XBQM20	STMMW_27031	bapA	Ig-like domain repeat protein	G8986T	11475	ATGCGTCTACTCGCCGTGGTTTCGAAATTGACTGGCGTCTCCACCACTGTGGAATCCTCAGCGGTCACTCTTAACGCCCCGTCAATTGTTAAATTATCAGTGGCCCGGGAGGAAATTAGTCAACTTACGCGCATTAATCAGGATCTGGTGGTGAGGCTCCATTCCGGCGAAACGATCACGATTAAAAACTTTTACGTTACCAACGATCTGGGCGCAAGCCAGTTAGTACTGGCGGAAAACGATGGCACGTTATGGTGGGTAGAAAATCCGCAAGCCGGGCTACATTTTGAACAAATCGCTGATATTAATGAGCTGCTGGTCACTTCTGGCGCTTCCCATGAAGCAGGCGGCGCCGTTTGGCCGTGGGTACTGGCTGGCGCGGTGGCGGCTGGCGGCATT…
XBQM20	STMMW_28401	sptP	pathogenicity island 1 effector protein StpP	C802T	1632	ATGCTAAAGTATGAGGAGAGAAAATTGAATAATTTAACGTTGTCTTCGTTTTCAAAAGTTGGTGTGTCGAATGATGCCCGACTTTATATTGCTAAGGAAAATACTGATAAGGCATATGTTGCGCCTGAAAAATTTTCGTCAAAAGTATTAACCTGGCTTGGAAAAATGCCGTTATTTAAAAACACTGAAGTGGTGCAAAAACATACGGAAAATATCAGAGTACAGGACCAAAAGATTTTACAGACATTTCTCCATGCACTAACGGAAAAATATGGGGAAACAGCGGTTAATGACGCACTGTTAATGTCCCGTATAAATATGAACAAACCCCTTACCCAACGTTTAGCAGTGCAGATCACGGAGTGTGTAAAAGCTGCTGACGAAGGGTTTATAAACCTT…
XBQM20	STMMW_40821	yijO	AraC family transcriptional regulator	C109T	852	ATGTATCACGACGTCAGCCACCTTCTCTCCCGTCTCATCAACGGCCCGCTGCCGCTGCGCCAGATTTATTTTGCCAGCGCCAGCGGCCCAGCGCCGGAACTGGCGTACCAGGTGGATTTTCCGCGGCTGGAGATTGTGCTGGAGGGCGAGCTTACTGACATGAGCATTACCGCCCCGCTCATTCCTTGCGATGTTCTCTACGTTCCGGCTGGCGGCTGGAACATCCCGCAATGGCAAACGCCCGTCACCACCCTGAGCATTCTGTTTGGCAAACAGCAGTTAGGTTTCAGCGTAGTCCACTGGGATGGTCAGCAGCATCAAAACCTCACGAAACAGCACGTTGCGCGCCGCGGCCCGCGTATCGGCTCGTTCCTGTTACAAACGCTTAATGAGATGCAG…
XBQM20	STY3086		outer membrane usher protein	C1039T	2700	TTGATGAATAACACATGGAAAAGTGTTCTTTGCCCAATAGCGTGTGGAGTGGGAATGCTTCTAAGCGCCTCCCCTTATAGCGCGTCAGGCAAAGACATCGAATTTAATACCGATTTCCTCGATGTAAAAAATCGCGATAACGTCAACATTGCACAGTTTTCTCGTAAGGGTTTTATCCTGCCAGGCGTCTACCTTTTACAAATTAAAATTAACGGACAGACTCTGCCGCAGGAATTTCCTGTTAACTGGGTTATTCCAGAACATGATCCACAAGGAAGTGAGGTTTGCGCAGAACCAGAATTAGTTACGCAATTGGGTATAAAGCCGGAACTCGCGGAAAAACTCGTCTGGATAACGCACGGTGAACGACAATGTCTGGCGCCAGATTCACTGAAAGGC…
XBQM90	STMMW_03291	frsA	esterase	C727T	1245	ATGACACAGGCTAACCTCAGCGAAACCCTGTTCAAACCCCGCTTTAAACATACTGAAACGTCTACCCTTGTCCGTCGGTTCAATCGTGGGTCGCAGCCGCCCATGCAATCCGCGCTGGACGGTAAGAACGTCCCGCACTGGTATCGCATGATAAACCGCCTGATGTGGATTTGGCGCGGCGTTGACCCACGAGAAATCCTTGATGTGCAGGCGCGCATTGTGATGAGCGACGCAGAGCGAACGGATGATGATTTATACGATACGGTCATCGGTTACCGCGGCGGCAACTGGATTTATGAGTGGGCAAAGCAGGCGATGGACTGGCAGCAGAAAGCCTGTCAGGAACAGGACGCCATGCGCAGCGGACGCTACTGGCTTCATGCCTCAACGCTCTATAAC…
XBQM90	STMMW_05381	ylaB	cyclic diguanylate phosphodiesterase	C1106A	1551	GTGACAACACGACATCTGGTCAGCCTGGTAACGGGAGTGCTTATCCTGTCTGTCCTTTTCCCGATAGGATTGAGTCTGTGGCTGGCGCACCGTCAAGTTGAAAAGAGGTTTAATGAAGAGCTGGATATCTTCTCGTCCCGGGTGGCGCTACGTACAGAAAGGGTCAGTGACCAGGCAAAAGCCGCGTTAACGCATATTGCCTCCTTTAAAGGCGAGCCCTGCAGCAGTGCCCATTTACTCGCCATGCGCCGCGTGTCTTATAGCTTTCGGTATGTCCAGGAAGTTCTGTATCTTAAAAATTCGATTCCCGTTTGCTCCTCACTTGAAAAAGAGAGCCATATTCCCGCGTTCCCTCCGCCCATGAAAATCACTCGCGACGGTTATCGCGCCTGGTTTACG…
XBQM90	STMMW_11241	scsB	copper-sensitivity suppressor B	C766T	1887	ATGATGATTTTGTTCAGGCGGATACTGTTCTGCCTGTTATGGCTTTGGCTGCCCGTCTCCTGGGCGGCGGAAAGCGGCTGGCTGCGTTCGCCCGATAACGACCATGCCAGCATACGGCTACGTGCCGATACGTCCGCTAACGGTGAGACCCGGCTGTTGCTGGATGTCAAACTGGAAAACGGCTGGAAAACCTACTGGCGCGCGCCGGGGGAAGGGGGCGTGGCACCCTCTATCGCCTGGAAAGGCGACATGCCTGAGGTAAGCTGGTTCTGGCCAACCCCCTCGCGCTTTGATGTGGCGAATATCACCACCCAGGGATATCACGACGAGGTGACCTTTCCGATGATCGTGCGCGGTACGCTGCCGGCGACCTTGCGCGGTGTGTTGACGTTATCAACC…
XBQM90	STMMW_12631		peptide ABC transporter permease	G323A	975	ATGAAATTGTTCTTCAGTCATTTTTTGCGGCTGATTATTCTGTTGGTGCTGGTGGCTGCCGGCACCTTCATTTTGCTTAGCTTTTCGCCCGTTGATCCTATCCGTGCTTATATTGGCAACGATCTGCTCCATGTTCCGCCAGAACAATATGCGCGGATTGCGGCGCGCTGGGGGCTTGACCAGCCGCTGTGGGAGCGTTTCGGTCACTGGTTTTGGCGTCTGCTCCAGGGCGACATGGGGTATTCCATGCTGTTCAACATGCCTGTCGCCAGTGTGATCCGGGAACGTTTTGCGACGTCATTCGCGCTGCTGGCAGGCGCCTGGCTATTGTCTGGTGTGCTGGGCGTGACATTGGGTTTTCTGGCCGGACGTTTTCTCCACCGTTGGCCGGATAAGATG…
XBQM90	STMMW_12651		ABC transporter ATPase	C490T	798	ATGCTGAGTTTACAACAGGTTACGCTGGAAAGCGCGCGTTATCGCTGGTATGGCGCGAGACGCTGGTCGCCGTTATTACAGAATGTCTCTTTTGATATCGCGCCCGGCGAAATGGTGGCATTGGTTGGCGGCAGCGGGGAGGGCAAAAGTCTGCTGCTGCAATGCCTGCTCGATCTGCTGCCGGAAAATTTACGCTTTCGGGGGGAGATTACGCTTGATGGCAACCGGCTGGACAGACATACCATCAGGCAGCTTAGGGGCAATACGTTTAGCTACGTGCCGCAGGGGGTACAGGCGCTTAATCCCATGCTGAATATCAGAAAACATTTGAACAGAGCATGTCATCTGACCGGACGCGCCTGGGATGAGACGCAAATGGTACAGCTATTACAGCAAAGC…
XBQM90	STMMW_14701	fumC	class II fumarate hydratase	C178T	1404	ATGGTAACGGTACGCCGCGAGAAAGATTCAATGGGCGCGATTGAAGTCCCGGCAGATAAACTGTGGGGGGCGCAGACTCAACGTTCGCTGGAGCATTTTCGGATTTCCACGGAGAAAATGCCCGTCTCGCTCATTCACGCTCTGGCGTTGACCAAGCGCGCCGCTGCGAAGGTCAACCAGGACTTAGGGTTGTTGGCGGCGGAAAAAGCCAGCGCGATTATCCAGGCGGCTGATGAAGTGCTGGCGGGAAAACATGCTGATGAGTTTCCGCTGGCGATTTGGCAGACCGGGTCCGGTACGCAAAGCAACATGAATATGAATGAAGTGTTAGCGAACCGCGCCAGTGAAATTTTGGGCGGCGTTCGCGGTATGGAACGCAAGGTGCATCCCAATGATGAC…
XBQM90	STMMW_15831	yncC	colanic acid/biofilm transcriptional regulator	C469T	666	ATGCCGGGTACGGAAAAAACACAACATATAAGCCTGACCACACAGGTTGAAAATCGGTTAAAGCATCAATTGTCTATTGGCGCATTAAAACCAGGCGCAAGGCTTATCACTAAAAATATCGCTCAAGAGTTAGGCGTCAGTATTACGCCGGTGCGTGAGGCCCTGTTAAGGCTGGTCTCTTCCAGTGCTTTGGCGGTGGCGCCAGCACAGGCGTTTATGGTGCCGGAGATCTCGCTGGAAAGTTTGCTGGAAATTAATACGATTCGTACTGCCCTGGAGGAGATGGCGGTGGTCGCCGCTGCGGGTAAGATTACCCCGGATCGCGAGCAGACGCTGAATGCGCTATTAGATGAATTTCAACAGGCGCTGGAAAGTGGCGTTATGGAGAAAATTCTTTTG…
XBQM90	STMMW_19001	cheB	chemotaxis response regulator protein-glutamate methylesterase	C886T	1050	ATGAGTAAAATCAGGGTATTGTCAGTTGATGATTCCGCGCTAATGCGCCAAATCATGACTGAAATTATTAATAGCCATAGCGATATGGAGATGGTGGCGACTGCGCCGGACCCGTTGGTCGCCAGGGATCTCATCAAAAAATTTAATCCGGACGTATTGACCCTGGACGTTGAGATGCCGCGTATGGACGGCCTCGATTTTCTGGAAAAACTGATGCGCCTGCGACCGATGCCGGTGGTGATGGTCTCTTCGCTGACCGGGAAAGGTTCCGAAGTGACGCTACGGGCGCTGGAGTTGGGGGCCATCGATTTTGTCACCAAACCGCAGCTTGGCATTCGTGAAGGTATGCTGGCGTATAGCGAGATGATCGCCGAAAAAGTGCGTACCGCCGCGCGGGCC…
XBQM90	STMMW_18941	yteR	glycosyl hydrolase family 88	C1090T	1140	ATGATGGTTTATCCAGTCAAACACAGTCCGCTATTGCGTCAGCCTGAGCATTTTATCGCCAGAGATGAACTAAAAGCCCTGGTGCAAAAGGTGACGCATAACCTGGTCAATATTAAAGATGAGACAGGCGAATTTTTATTGCGACTGGACGACGGACGCGTGATCGATACTAAAGGCTGGGCCGGATGGGAGTGGACGCACGGCGTGGGCCTGTACGGAATGTATCACTATTACCAACAGACCGGCGACCAGACGATGCGTAAGATCATTGATGACTGGTTTGCCGATCGTTTTGCGGAAGGCGCGACGACGAAAAACGTTAATACGATGGCGCCGTTTTTAACGCTGGCGTATCGCTATGAAGAGACGCGTAATCCAGCGTATTTACCGTGGCTGGAA…
XBQM90	STMMW_21521	asmA	outer membrane assembly protein AsmA	C817T	1857	ATGAGACGATTTCTGACGACGCTGATGATTCTCCTGGTCGTGCTGGTGGCCGGATTCTCTGCGTTGGTATTGTTGGTCAATCCGAATGATTTCCGCGCCTATATGGTGCAGCAGGTTGCCGCGCGTAGTGAATATCAGTTGCAACTTGACGGGCCGCTGCGCTGGCACGTATGGCCGCAACTGAGTATCCTTTCCGGGCGAATGACGCTAACGGCGCGAGGCGCCAGCGAACCGCTGGTGCGGGCTGACAATATGCGCCTGGATGTTGCTTTATGGCCGCTATTGAGTCATCAGCTTCATGTTAAGCAGGTGATGCTGAAAGGCGGGGTGATTCAACTGACGCCGCAAACGGAAGCGGTACGCAGCGATGATGCGCCGGTCGCGCCGAAAGATAATACC…
XBQM90	STMMW_20351	yeeI	DgsA anti-repressor MtfA	C730T	798	ATGATTAAGTGGCCCTGGAAAGCACAAGAAATAACCCAGAACGAAGACTGGCCGTGGGATGATGCGCTGGCTATACCTCTTCTGGTAAACCTCACCGCGCAAGAACAGGCTCGGCTTATTGCGCTAGCCGAACGTTTTTTGCAGCAGAAAAGACTGGTAGCGCTACAGGGATTTGAGCTCGACTCGTTAAAAAGTGCACGTATTGCGTTAATTTTTTGCTTACCGATCCTGGAGCTCGGTATTGAGTGGCTTGATGGTTTTCATGAAGTGCTCATTTATCCCGCGCCCTTTGTGGTAGATGATGAATGGGAAGATGACATAGGTCTGGTGCACAGCCAGCGTGTCGTACAGTCGGGGCAAAGCTGGCAACAAGGGCCCATTATTCTGAACTGGCTGGAT…
XBQM90	STMMW_27041	lapE	TolC family type I secretion outer membrane protein	G550T	1410	ATGGGAAGAGTCGCGCCTGTCGCCATCGTACTGGCATTTGCTTTGTTTCATCACCAGCCCCGGGGCGCAGAAGCGCCGCCAATGATTACATCCGAAGGATTAGCAACGGACCAGATGCTTCCTTCGCTGGATGGCTCCGCCGCTGAGTTGCCGCTCAGCGCCGCCGCGCCGGGCAACCTGACGCTCAATGACGCGGTCAATCGCGCCGTTAACTGGCATCCTTCTATTCGCGAAGCCATCGGCAAACTGCTCGCACAGAATGAACAAATAGAGGTCGCCAAATCGAAATATTATCCGCAAGTCAGCGCTGGCGTGAACAATGGGTACAGCAATACCTACACCGATCACGGGTATAGCCCCTCGCTAGTGCTGTCGGTATCGCAAATGCTTTATGACTTC…
XBQM90	STMMW_32461		hypothetical protein	220_I1	387	GTGAAACTGACCGATAAGCCGGGTTCTGTCGTGGACAGTCATTCATCTAGGCCAGCAATCGCTCACTGGCTCAAGCAGCCTACCCGGGTTCAGTACGGGCCGTACCTTATGAACCCCTATTTGGCCTTGCTCCGGGTGGAGTTTACCGTGCCACGGACTGTTACCAGCCGCGCGGTGCGCTCTTACCGCACCCTTTCACCCTTACCTGATCCCACTTACGTGGGCCATCGGCGGTTTGCTCTCTGTTGCACTGGTCGTGGGTTTCCCCCCCAGGCGTTACCTGGCACCCTGCCCTATGGAGCCCGGACTTTCCTCCCCTCCGCCCGTCTCCCCGAAAGGACGACGACGAAGCGGCGACTGTCTGGTCAGCTTCGGCGCGCAGTATAG
XBQM90	STMMW_35961	yhjC	LysR family transcriptional regulator	G683A	900	ATGGATAAAATATATGCAATGAAATTGTTTGTACGCGTGGCGGAACGGGAAAGTTTTTCCCGTGCAGCAGAGGATATCGGCCTTCCCAAAGGCAGCGTCTCACGGCAAATACAAGCGTTAGAACATCAACTGGGCATCCGCCTGCTCCACCGCACCACCCGGCGGGTACAGCTTACTCAGGACGGAATGGTTTACTACGAACGGGCAAAAGATCTGTTGAGTAACCTGGATGAACTGGAGGGTCTTTTCCAGCCTGATCCCGCCAGTATCAGTGGCAAAATACGGGTAGATATACCGCCATGTCTCGCAAACAGCCTCATCATGCCGCGCCTGCCCACTTTTTTGCATCAGTATCCCGGCATTGCGCTGGAACTTTGTAGTAGCGATCGACAGGTCGAT…
XBQM90	STMMW_37551		hypothetical protein	796_D12	942	ATGAAAAAAAGCCCCACGTCCACGCCTCATGATGCGGTATTCAAAACGTTTTTACGCCATCCGGATACCGCGCGGGATTTTCTCAATATTCATCTTCCCCATTCGCTAAGAATACGTTGCGATCTGACGACGTTGAAACTGGCGCCGGACAGTTTTATCGAGAAAAATTTACGCGCGTTTTATTCCGATGTCCTTTGGTCGCTAAAAACGTGTGAAGGCGACGGTTATATCTATGTCGTTATAGAGCATCAGAGTACGCCGGACGCGCATATGGCGTTCCGGTTAATGCGTTACGCCACTGCCGCGATGCAGCGCCATCTGGATGCTGGCCATAAAACGTTACCGCTGGTGATTCCCATGCTGTTTTACCATGGCGCGAAAAGCCCGTATCCCTTTTCG…
XBQM90	STMMW_38091	torT	TMAO reductase	T744A	1041	ATGCGCGCGCTTATTTCGTTCTTTTTTTTGATAATCATCGTCTCGAATATAGAAACGGCGTCAGCCGAAACCGGACTGCTACACTGGACGCGCGCCGATCGGGCGATTCCCTGGCGGCAAACGTCAGTCAATGCGAGTAAACCCTGGAAACTGTGCGCATTATACCCCAGCCTGAAAGATTCTTACTGGTTGTCCGTCAACTACGGGATGCAAAAAGCGGCCAAATTGTATGGCGTTGATTTAAAAGTGCTGGAAGCGAATGGCTATCGGCAACTGGCGACGCAACAACAGCAAATGATGCAGTGCCGGGAGTGGGGCGCCGACGCTATTCTGCTTGGCAGCAGTACCATTCGTTTCCCGGAACTGGAACGGTATGCCGGTAATGTGCCGGTTATTGAA…
XBQM90	STMMW_38521	atpA	ATP synthase subunit alpha	G1538A	1542	ATGCAACTGAATTCCACCGAAATCAGCGAACTGATCAAGCAGCGCATTGCTCAGTTCAATGTGGTGAGCGAAGCTCACAACGAAGGTACTATTGTTTCTGTCAGTGACGGTGTTATCCGCATTCACGGCCTGGCCGATTGTATGCAGGGTGAAATGATCTCCCTGCCGGGTAACCGTTACGCTATCGCACTGAACCTGGAGCGCGACTCCGTGGGTGCGGTAGTCATGGGTCCATACGCTGACCTTGCCGAAGGCATGAAGGTTAAATGTACGGGTCGTATCCTGGAAGTTCCGGTTGGCCGCGGCCTGCTGGGACGTGTGGTAAACACCCTGGGTGCGCCAATTGACGGTAAAGGTCCGGTTGATAATGACGGCTTCTCTGCCGTTGAAGCGATTGCG…
XBQM90	STMMW_42181	gst	glutathione S-transferase	G485A	669	ATGCTGACGGTGCACCATTTAAATCAGTCTCGTTCGCAGCGCATCTTGTGGGCGCTGGAAGAGCTGGCGTTGCCTTACCAGATTGTGCGTTACCAGCGTGAAAAGACCATGCTGGCGCCGCCGGCATTGAAAAAAGTGCATCCGCTGGGCAAGTCTCCGGTTATCGAAGATCACGGTATGGTTATTGCGGAATCGGGCGCCATCCTGGAATATTTGCAGGACACTTACGACAGTATCGGACGCTTTAAACCTGCGGATGCGCAGGGGAAACAACACTATCGCTTCTGGCTACATTACGCTGAAGGTTCTCTCATGCCCTTGCTATTGATGAGACTGCTCTTTACCTCTCTGGGTAAACCGCCGGTACCATTGGGCCTGCGAACGTTGGGCGGCGTTATC…
XBQM90	AT698_RS15335		hypothetical protein	G123A	186	ATGGATATCAGTCTTATTAGTCTGGTCGAGGTGCCTTTTGCATACGGTAAGCCACTGCGGCAGAACATGTCGTGGGCGAAGAAACTGTCGAAACATGAATGGCGAAAGGCGTTATTTATCTGGCCGAATAACCGGGGGGCAAAAAAACAAAAGGGCAATAATATATTGCCCTTTGTAATCAATTAA
XBQM90	FORC20_RS08100		hypothetical protein	G736T	741	ATGCCGACTATGAATAGTTATAGATTAACTTTTTCTTTATATTTCCTGCGTTCGGTAATGTTGCTTAGCATCATTTTAACAAGTGTTGGTTGTAATAATCAAAAGAGTAAGGCGTTGCTTCTACCTGTTGATTCTACGCAGTTTGCACAATTGGCTTGTTATTATAAAGATATTAATTCCGATGATAATGTAATGGAGTTAAAATTACCAAGTGAATATAAAGAGAAAACTAACTTATTTAATCAACAGGAAATTAAGGTGCCGGTAAAAGGTGAGAATTTTCTTTCTCCGTATATTGGTGATGGTGTCCGTTATTATGAATTAGGGTACTTTGAACATGATGGTAATACTTACAAATTGATAATTTATAATAAAATTGGAGAGTCTGATACGTTATTG…
XBQM90	PSLT025		putative cytoplasmic protein	128_D1	297	ATGGATGCTGAATTTCAGAAACAGGGGCTCACCGACCTAACAGAAACAGATCTGCAGGCCGTTGTAACTCCCGGGGAGACACTCCGGTTACTGCCGACACTGGCGCGGTTACTGCATGTTTTGCGAGAAAAACCAGAGGCCTTCTCCCTCTCAGCAGCTTCATACGAAGAAGATACTTCCTCAGCTTTGAAAACACTGCTGGTCCGTACAGGATTCACAATACACCAGATAAGAGAAATGCGACTTCACCTTATTCGCTGGCAATTAATAAGTCAGGAAGAGTATGACCGGGAATAA
XBQM90	SCH_RS08050	ydfJ	MFS transporter	1344_I1	1512	ATGACACAAATAAAGCATGAACGATCGACTCAGGATTTAGTGCGCGCTGCCGTATCTGGCTGGTTAGGCACCGCGCTTGAATTTATGGATTTTCAGTTATATTCACTAGGCGCGGCTCTGGTCTTCCATGAGATATTTTTCCCGGAACAGTCTGCCGCGATGGCGCTTATTCTGGCAATGGGCACCTATGGTGCAGGTTATATAGCCAGAATTATCGGCGCCTTTGTTTTTGGTAAAATGGGCGACCGCATCGGACGAAAAAAAGTATTGTTTATTACTATCACCATGATGGGGATCTGCACCACGCTGATTGGCGTACTGCCGACGTATGCGCAAATCGGCATTTTTGCGCCAGTATTACTGGTAACATTGCGAATTATACAGGGGCTGGGCGCCGGG…
XBQM90	SEEC0708_RS09875		transposase	G1015T	1209	ATGGACGAAAAGAAACTCAAAGCCCTTGCGGTTGAACTGGCTAAAGGCCTTAAAACCGAAGCCGACCTCAATTCGTTTTCCCGTATGCTGGCGAAATTAACCGTCGAAACGGTGCTCAATGCGGAGCTGGCTGACCACCCCGGGTATGAGAAAAATGCGCCCAAAACAGGCTCAAACACCCGTAATGGCTACTCGTCCAAAACGGTGTTGTGCGATGACGGCGAGATAGAACTCAACACACCGCGTGACCGTGAAAACACCTTCGAACCACAGCTGCTTAAGAAGCACCAGACGCGCATTACGCAGATGGACAGCCAAATTTTATCCCTCTACGCCAAAGGCATGACTACCCGCGAAATCGTCGCCACCTTCAAAGAGATGTACGACGCCAATGTGTCA…
XBQM90	STMMW_00221	bcfC	outer membrane usher protein FimD	C1636T	2622	ATGCGTAATCAGCTTTTCATGACGCGATATTACTCCAGCGTAACTAAACCCGTATTAACCCCGCTGGCGTTGGCTATCGCACTGGCGCCTGCGCCGGGGTGGGCGGAAAACTATTTCAACCCGGCATTTCTGTCTGACGACCCGTCTGCGGTGGCCGACCTATCGACCTTTTCCCGTAATGCCCAGGCGGCGGGGATGTATCGCGTTGACGTTTACCTGAACAATACGTTTCTCGCAACCAGAGACATTGCCTTCCAGGCGGTGAAAACGACGGGAAAAAGCGCGCCCACCGATGACAGCGGATTACGCGCCTGCCTGACGCCTGAAATGCTTAAAAATATGGGGGTAAACACCGGGGCGTTTCCACTGTTGGCGAAGGCGGCGGCGGGAAGTTGCCCG…
XBQM90	STMMW_08521	slrP	leucine-rich repeat protein SlrP	C2293T	2298	ATGTTTAATATTACTAATATACAATCTACGGCAAGGCATCAAAGTATTAGCAATGAGGCCTCAACAGAGGTGCCTTTAAAAGAAGAGATATGGAATAAAATAAGTGCCTTTTTCTCTTCAGAACATCAGGTTGAAGCACAAAACTGCATCGCTTATCTTTGTCATCCACCTGAAACCGCCTCGCCAGAAGAGATCAAAAGCAAGTTTGAATGTTTAAGGATGTTAGCTTTCCCGGCGTATGCGGATAATATTCAGTATAGTAGAGGAGGGGCAGACCAATACTGTATTTTGAGTGAAAATAGTCAGGAAATTCTGTCTATAGTTTTTAATACAGAGGGCTATACCGTTGAGGGAGGGGGAAAGTCAGTCACCTATACCCGTGTGACAGAAAGCGAGCAG…
XBQM90	STMMW_12741		hypothetical protein	A28T	150	ATGCTTATTCGTTTAAACTGGAGTGAGAAAAAAGAACAGGCCGTTGATTCTGCGGAATCTTCATTTAAAGTGTATAAAATATACAACAAATCACACAAATGTGATGCGCATCACGTTTTTATGATTTTTTATTACAGTTTTATGATATAG
XBQM90	STMMW_21702		hypothetical protein	G61T	117	TTGAAATGTTGCGCACTTATTGCTTTACCGTTTTTCTTCCTGCTGTACGCAGCGGTAAGCGAAGCATGGTTTAAGGCAAATGGCGACAAGAGAGATGCCGGTATGCGCATTGAGTAG
XBQM90	STMMW_20361		peptidase	C280T	474	ATGGCATTAACCGATACCGCTGGCGGCACGCAGACCGATCCGGGTACAGGAAAACCGTCAGAAAATCCACCCGCCGCTCCCAATAAGCCCACTCCACCGAAAGAAGAAACGCCGCCCGGCGCGCCGGAGAAATACGCGTTCACCGCCCCTGAAGGTCAGGAACTCGATACCAGCGCGCTGGCGCAGTTCGAACCAGTGGCGCGTGAACTGAACCTGACGCAGGAGCAGGCGCAGAAGCTGGTGGACGTCTATCCGAAAGTGCTGGCGGGAGTGCAACAACAGCAAGCGGAGTCATGGCAGAAGCAAACAGAAGACTGGGCTGCGGCAGTTAAAGCCGATAAAGACATTGGCGGTGACAAGCTGGCGTCTAATCTTGGCGCAGCTCAGCGGGCTATCGAC…
XBQM90	T_RS23580		putative secreted protein (pseudogene)	C415T	495	ATGAAAAAATCACCATTATGCTGCTACCTGTTTTGTGCAGCGATGTCAGCTTCATCAGCCGCGCTGGCTGCTACCGCGCCGGTCTCCGCAGGCGTTATTCATTTCAAAGGCCAGATTGTCGAATATGGTTGTAATCTTGCGCCTCACGATCGCAATATCGAGGTATCATGTTTGCGGAATCCCCCATTTGCAGACAGTCGCCACACCGTCTGGAAACGCTATTTCGTTGATGAATGGAATCGCCACGGTACGGCACGTGTCGTTAAAAGATCATCCGGAGATTCAAAGCCTGATCGTCCAGTACCGCTAACCGCTTATGGCTCCCGACGGGAGGAGTTCCGGCAGGCGGCGATTTCGCTCAGTAAAACGCCGCCCGCTTGCATTTTGTACTTTTCTCTC…
XBQM90	STMMW_08161		LysR family transcriptional regulator	G812A	984	GTGTATAATGCTACTTATATAAATGAAACTCATCCAATGCTAATAAGGTTGCAGCTTATGCAATATCGGCATCACCTCGAACTAACATGGCTCGAAGACTGTCTGGCTCTAAAAGAAACGTTGAATTTCTCAAAAGCGTCTGCCTCAAGATATGTGACTCAACCCGCATTTAGTCGTCGGATACAATCTCTCGAAGAATGGGTGGGTACGCCCCTTTTTGAAAGAAGTAAACGGGGAGTCACCCTTACCAAGGCCGGAGAAGTATTTACAGACCAGCTTCCCGAACTGATCCACTCCTTGTACACATTGAAAAGTGATACCCTTGAGGCCGCAGGTAATAAACAACCCAGTCTTGTTTTTTCAGCAACGCATGCTTTGTCTTTCTCTTTTGTACCGCAT…
XBQM90	STMMW_15411		zinc-type alcohol dehydrogenase	C999A	1026	ATGAAAGTCAAAGCTGTGTTCATTAATAAGCCTGGTGAAGTTGAAACCCGCTGGGTGGATTATCCCCATAAGAAAGAAAATGAAGTATTAATTAAGGTTGATGCTGCAGGCATTTGCGGATCGGATATCGGGGCTTTTCGTGGAACGAACCCACTGGTTACTTACCCAAGAATTATTGGGCATGAAGTGACCGGAATTGTTCTTCAGGAAGGCGCCGGAATGCCGGACAATATTAAAGAAGGTGACCGCGTAATTGTTGACCCCTATATTTATTGTGGTCACTGCTACCCTTGCTCTGTCGGCAGAACTAATTGTTGTGAAAATTTAAACGTCATTGGCGTGCATGTCGATGGCGCAATGCAGGAGGTGGTTACTCATCCCGCACATTTAATTCATAAA…
XBQM90	STMMW_20841	pduT	propanediol utilization: polyhedral bodies pduT	G534A	555	ATGTCTCAGGCTATAGGAATTTTAGAACTCACCAGCATCGCCAAAGGCATGGAGCTTGGTGATGCCATGCTGAAAAGCGCCAACGTCGATCTACTGGTCAGCAAGACCATCTGTCCGGGGAAGTTTTTACTGATGCTGGGCGGCGATATCGGCGCTATCCAGCAGGCCATTGAAACCGGTACGTCGCAGGCCGGCGAGATGCTCGTCGACAGCCTGGTGCTGGCGAATATTCATCCCAGCGTACTTCCGGCCATCAGCGGCCTGAACAGCGTCGATAAGCGCCAGGCGGTAGGTATCGTCGAAACCTGGAGCGTGGCGGCCTGCATTAGCGCCGCAGACCGGGCGGTGAAAGGCTCAAACGTCACCCTGGTGCGGGTGCATATGGCCTTCGGTATCGGC…
XBQM90	STMMW_29901	stdB	fimbrial outer membrane usher protein StdB	C2188T	2490	ATGAAAATTACCCGGCTTGCCATTCTGATTACCCTGACATTTTCCGTCCTGAAGTCGCAGGCCACGGAGTTCAATGCCAGCCTGCTGGACAGCGGGAACCTGTCTAACGTGGACCTCACGGCCTTCAGCCGCGAGGGGTATGTGGCGCCCGGTAACTATATTCTCGATATCTGGCTCAATGACCAGCCGGTACGGGAACAGTATCCGGTCAGGGTTGTACCGGTTGCCGGACTCGACGCGGCCGTCATCTGTGTGACAACAGACATGGTGGCCATGCTGGGTCTTAAGGATAAGATTATTCATGGCCTGAAACCCGTTACCGGTATCCCGGACGGGCAATGCCTTGAGCTGCGCTCCGCTGACAGTCAGGTACGGTACAGCGCTGAAAATCAGCGTCTG…
XBQM90	STMMW_30441		fructuronate reductase	C1141T	1473	ATGGACACCATAGCTCGCCAGTTAGACGCCGCAAGGCACCAATTCAAAACGACTTATTCACGTCAGGGAATGGAAGCCAACATCGTACATATTGGATTTGGCGCCTTTCACCGTGGTCATCAGGCTGTTTATAACGATCTCACGAATGAGATAACCGGCAACCGCTGGGGGATTTTTGAACTGAATCTGTTCGGCGATGCGGAGCTGGTGGATGCGCTAAATGCGCAACAGGGGCTGTTTTCAGTGGTGGAAACGTCAGCCAGCGCCATCAATAGTCGCCTGGTTCGTACCATCACCGGCGCGTTGCATACGCCGAAGTCAGGTATTCAGGCGGCGATCGAGAAGCTGACTGAGCCGCAGGTAAAAATTGTTTCGTTGACGATAACGGAAAAAGGTTAC…
XBQM90	STMMW_40991	tufB	elongation factor Tu	314_I1	1185	ATGTCTAAAGAAAAGTTTGAACGTACAAAACCGCACGTTAACGTCGGTACTATCGGCCACGTTGACCATGGTAAAACAACGCTGACCGCTGCCATTACTACCGTACTGGCTAAAACCTACGGCGGTGCCGCTCGCGCATTCGACCAGATCGATAACGCGCCGGAAGAAAAAGCGCGTGGTATCACCATCAACACTTCTCACGTTGAATACGATACCCCGACCCGCCACTACGCACACGTAGACTGCCCGGGGCACGCCGACTATGTTAAAAACATGATCACCGGTGCTGCTCAGATGGACGGCGCGATCCTGGTTGTTGCTGCGACTGACGGTCCGATGCCGCAGACCCGTGAGCACATCCTGCTGGGTCGTCAGGTAGGCGTTCCGTACATCATCGTG…
* SNVs are shown as ReferenceAllele-Position-AlternativeAllele. Indels leading to premature stops codons are shown as: Position_InDel-NumberBases.
